# Supplementary material for: Serum exosomal microRNA-146a as a novel diagnostic biomarker for acute coronary syndrome
Source: PubMed Central journal article supplement — J Thorac Dis. 2021 May;13(5):3105–14. doi: 10.21037/jtd-21-609 (PMC8182505; doi:10.21037/jtd-21-609), 2021-05
Supplement: jtd-13-05-3105-dss.pdf [file jtd-13-05-3105-dss.pdf]

## Data Sharing Statement

|                     |                                                                                                                                                     |                                                                                                                  |
|---------------------|-----------------------------------------------------------------------------------------------------------------------------------------------------|------------------------------------------------------------------------------------------------------------------|
| <b>Article Info</b> | <a href="http://dx.doi.org/10.21037/jtd-21-609">http://dx.doi.org/10.21037/jtd-21-609</a>                                                           |                                                                                                                  |
| <b>Item</b>         | <b>Question</b>                                                                                                                                     | <b>Authors' Response<br/>(place "-" if not applicable)</b>                                                       |
| 1                   | Would you like to share data collected for your study to others?                                                                                    | Yes.                                                                                                             |
| 2                   | If not, would you like to share the reason for your decision?                                                                                       | -                                                                                                                |
| 3                   | What data in particular will be shared?                                                                                                             | The clinical characteristics data and qPCR results.                                                              |
| 4                   | Any other documents will be shared? Such as study protocol, statistical analysis plan, informed consent form, clinical study report, analytic code. | Statistical analysis plan, informed consent form, and clinical study report will also be shared if requested.    |
| 5                   | When will data availability begin?                                                                                                                  | From the publication date.                                                                                       |
| 6                   | When will data availability end?                                                                                                                    | Two years within the publication date.                                                                           |
| 7                   | To whom will you share the data?                                                                                                                    | Medical cardiologists who are interested in studies of acute coronary syndrom.                                   |
| 8                   | For what type of analysis or purpose?                                                                                                               | For analysis to evaluate the diagnostic value of exosomal microRNA-146a for acute coronary syndrome.             |
| 9                   | How or where can the data/documents be obtained?                                                                                                    | Emails could be sent to the address below to obtain the shared data:<br>279182800@qq.com                         |
| 10                  | Any other restrictions?                                                                                                                             | We may balance the potential benefits and risks for each request and then provide the data that could be shared. |
